# Supplementary material for: Uncertainty-based flood resiliency evaluation of wastewater treatment plants
Source: Oxford University Press journal article supplement (doi:10.2166/hydro.2016.084), 2016-08-12
Supplement: jh2016084supp1.docx [file jh2016084supp1.docx]

**Appendix**

The following questionnaire was designed in the survey and sent to water professionals.

Thank you for agreeing to participate in this survey. The questionnaire aims to collect information about importance of different criteria in flood resiliency of wastewater treatment plant. Resiliency is here defined as the system’s ability to withstand the consequences and return to the functioning state. The survey is completely anonymous and remains strictly confidential. Please assign a number to importance of each factor.

Again, thank you in advance for participating in this survey!

Please fill out the following tables:

|  | Importance | | | | |
| --- | --- | --- | --- | --- | --- |
| Factors | Very low  (1–2) | Low  (3–4) | Moderate  (5–6) | High  (7–8) | Very high  (9–10) |
| Adverse environmental impacts |  |  |  |  |  |
| Plant capacity |  |  |  |  |  |
| Post stress recovery (Number of days for returning to normal state) |  |  |  |  |  |
| Number of residents served |  |  |  |  |  |
| Additional load in flood time |  |  |  |  |  |
| Critical flood elevation |  |  |  |  |  |
| Minimum inundation depth |  |  |  |  |  |
| Percent of not at risk equipment |  |  |  |  |  |
| DMR violations (violations of measured data from standard) in monitoring system |  |  |  |  |  |
| Damage cost from the most severe historical hurricane |  |  |  |  |  |

|  | Importance | | | | |
| --- | --- | --- | --- | --- | --- |
| Factors | Very Low  (1-2) | Low  (3-4) | Moderate  (5-6) | High  (7-8) | Very High  (9-10) |
| Number of plant technical staff |  |  |  |  |  |
| Availability of dewatering facilities |  |  |  |  |  |
| Total risk avoided for every single dollar |  |  |  |  |  |
| Existence of underground tunnel system |  |  |  |  |  |
| Availability of WWTPs in the neighboring area |  |  |  |  |  |
| On-site storage |  |  |  |  |  |

Please provide your comments, suggestions of feedback if any.
